# Supplementary material for: Quality and safety in transitional care of the elderly: the study protocol of a case study research design (phase 1)
Source: PubMed Central journal article supplement — BMJ Open. 2013 Aug 6;3(8):e003506. doi: 10.1136/bmjopen-2013-003506 (PMC3740255; doi:10.1136/bmjopen-2013-003506), 2013-08-06
Supplement: bmjopen-2013-003506.draft_revisions.pdf [file bmjopen-2013-003506.draft_revisions.pdf]

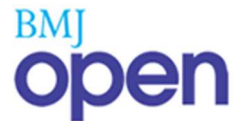

## Quality and Safety in Transitional Care of the Elderly: The Study Protocol of a case study research design (Phase 1)

|                                 |                                                                                                                                                                                                                                                                                                                                                                                                                                                  |
|---------------------------------|--------------------------------------------------------------------------------------------------------------------------------------------------------------------------------------------------------------------------------------------------------------------------------------------------------------------------------------------------------------------------------------------------------------------------------------------------|
| Journal:                        | <i>BMJ Open</i>                                                                                                                                                                                                                                                                                                                                                                                                                                  |
| Manuscript ID:                  | bmjopen-2013-003506                                                                                                                                                                                                                                                                                                                                                                                                                              |
| Article Type:                   | Protocol                                                                                                                                                                                                                                                                                                                                                                                                                                         |
| Date Submitted by the Author:   | 29-Jun-2013                                                                                                                                                                                                                                                                                                                                                                                                                                      |
| Complete List of Authors:       | Aase, Karina; University of Stavanger, Department of Health Studies; Stavanger University Hospital, Regional Centre for Age-related Medicine and Coordination<br>Laugaland, Kristin Alstveit; Førde Central Hospital, Dyrstad, Dagrann Nåden; University of Stavanger, Department of Health Studies; Stavanger University Hospital, Department of Anaesthesiology and Intensive Care<br>Storm, Marianne; University of Stavanger, Health Studies |
| <b>Primary Subject Heading</b>: | Health services research                                                                                                                                                                                                                                                                                                                                                                                                                         |
| Secondary Subject Heading:      | Qualitative research, Health services research                                                                                                                                                                                                                                                                                                                                                                                                   |
| Keywords:                       | Quality in health care < HEALTH SERVICES ADMINISTRATION & MANAGEMENT, Protocols & guidelines < HEALTH SERVICES ADMINISTRATION & MANAGEMENT, Risk management < HEALTH SERVICES ADMINISTRATION & MANAGEMENT, Organisation of health services < HEALTH SERVICES ADMINISTRATION & MANAGEMENT, International health services < HEALTH SERVICES ADMINISTRATION & MANAGEMENT                                                                            |
|                                 |                                                                                                                                                                                                                                                                                                                                                                                                                                                  |

SCHOLARONE™  
Manuscripts

# Quality and Safety in Transitional Care of the Elderly: The Study Protocol of a case study research design (Phase 1)

Karina Aase<sup>1,2\*</sup>, Kristin Alstveit Laugaland<sup>3</sup>, Dagrann Nåden Dyrstad<sup>1,4</sup>, Marianne Storm<sup>1</sup>

<sup>1</sup>Department of Health Studies, University of Stavanger, N-4036 Stavanger, Norway

<sup>2</sup>Regional Centre for Age-related Medicine, Stavanger University Hospital, Norway

<sup>3</sup>Førde Central Hospital, Førde, Norway

<sup>4</sup>Department of Anaesthesiology and Intensive Care, Stavanger University Hospital, Norway

\*Corresponding author

Email addresses:

KAA: [karina.aase@uis.no](mailto:karina.aase@uis.no)

KAL: [kristin.a.laugaland@uis.no](mailto:kristin.a.laugaland@uis.no)

DND: [dagrann.n.dyrstad@uis.no](mailto:dagrann.n.dyrstad@uis.no)

MS: [marianne.storm@uis.no](mailto:marianne.storm@uis.no)

## Key words:

Transitional care – elderly – quality - patient safety – patient perspective – professional perspective

Word count: 4462

## ABSTRACT

### Introduction

Although international studies have documented that patients' transitions between care providers are associated with the risk of adverse events and uncoordinated care, research directed towards the quality and safety of transitional care between primary and secondary health and care services, especially for elderly receiving care from multiple healthcare providers due to complex health problems, is lacking. This study investigates how different aspects of transitional care can explain the quality and safety of elderly healthcare services in Norway. The overall aim of the study is to explore different aspects of transitional care of the elderly, in different contexts and how they might explain the quality and safety of care.

### Methods and analysis

The study applies a case study design. Two cases are chosen: one city-based hospital and one rural hospital with associated nursing homes and home-based nursing services. Admission and discharge to/from hospital to/from nursing homes or home-based nursing services constitute the main focal areas of the study, including the patient, next-of-kin and the professional perspective. The qualitative methods employed include participant observation, individual interviews and document analysis. To ensure trustworthiness in the data analysis, we will apply analyst triangulation and member checks. A total impression of the data material will first be created in a systematic text condensation approach. Second the qualitative data analysis will involve in-depth analyses of two specific themes: the risk perspective and the patient perspective in transitional care.

### Ethics and dissemination

1  
2  
3 The study is approved by the Norwegian Regional Committees for Medical and  
4 Health Research Ethics. The study is based on informed written consent, and  
5 informants can withdraw from the study at any point in time. Interview and  
6 observation data material will be managed confidentially. Results will be  
7 disseminated at research conferences, in peer-reviewed journals and through public  
8 presentations to people outside the academic community.  
9  
10  
11  
12  
13  
14  
15  
16  
17  
18  
19  
20  
21  
22  
23  
24  
25  
26  
27  
28  
29  
30  
31  
32  
33  
34  
35  
36  
37  
38  
39  
40  
41  
42  
43  
44  
45  
46  
47  
48  
49  
50  
51  
52  
53  
54  
55  
56  
57  
58  
59  
60

## INTRODUCTION

Transitional care has become one of the most pressing topics in the global efforts to improve the quality and safety of patients due to the growing evidence indicating a correlation of patient handovers with medical errors and adverse events. Transitional care in this setting is defined as a set of actions ensuring the coordination and continuity of healthcare as patients transfer among different locations and different levels of care within the same location [1]. The transfer of essential information and the responsibility for the care of the patient from one healthcare provider to another are integral and vital components of quality and safety in healthcare services.

The elderly population with complex health problems typically receives care from numerous healthcare providers and moves frequently within and across healthcare settings. A growing body of evidence suggests that the elderly are particularly vulnerable to experiencing discontinuity in care with the potential for adverse outcomes due to poorly executed transitions [1-4]. Elderly patients, many with reduced mental capacity, are those most dependent on a healthcare system that is able to communicate appropriately and transfer information and duties properly [5]. Frail elderly patients, particularly those with cognitive impairment, consistently suffer repeated hospitalisation, iatrogenic complications and uncoordinated care [6]. A review of the growing body of literature reveals that relatively little data are available to document quality and safety-related issues occurring during the transitions that interface between primary and secondary healthcare services [7]. Thus far, little data have been available to estimate the breaches to quality and safety in the post-hospital period [8]. A commendable exception is the recent HANDOVER-study, a large multi-centre and multi-national study on patient transitions from the acute hospital to the

1  
2  
3 primary care setting using a mixed-methods approach involving patients and care  
4  
5 providers [9].  
6  
7  
8

9  
10 The Coordination Reform, launched in 2009, is the principal healthcare reform  
11 implemented in Norway from 1 January 2012. The reform aims to solve three primary  
12 challenges in the Norwegian healthcare services: 1) patients' needs for coordinated  
13 services, 2) increased attention on disease prevention, and 3) population development  
14 and the changing range of illnesses among the population. The Coordination Reform  
15 further accentuates the relevance of the "Quality and Safety in Transitional Care of  
16 the Elderly" study as it implies changes to the contextual setting in which the  
17 transitional care of the elderly takes place.  
18  
19  
20  
21  
22  
23  
24  
25  
26  
27  
28  
29

## 30 AIMS

31  
32 The "Quality and Safety in Transitional Care of the Elderly" study has two main  
33 objectives:  
34  
35  
36

- 37 1. To explore different aspects of transitional care of the elderly (e.g.,  
38 coordination, multi-professional collaboration, patient participation) in  
39 different contexts (e.g., admission or discharge, densely or sparsely populated  
40 geographical areas) and how they might explain the quality and safety of care  
41 (Phase 1).  
42  
43  
44  
45  
46  
47
- 48 2. To design and test an evidence-based intervention program to assess the  
49 impact of transitional care on quality and safety and to implement  
50 improvements within the transitional care of the elderly (Phase 2).  
51  
52  
53  
54

55 This study protocol covers Phase 1 of the project.  
56  
57  
58  
59  
60

1  
2  
3 Thus far, most studies on transitional care (handovers, handoffs, etc.) have employed  
4 methods such as individual or focus group interviews with patients and professionals  
5 [10-14] and, to a much lesser extent, methods involving the real-time observation of  
6 practice when patients cross care provider boundaries. Real-time observational studies  
7 have been more common within, for instance, anaesthesia and surgery [15], where  
8 different methods and techniques have been employed in the study of behaviour of,  
9 for instance, operating theatre teams. Here, the focus is the professional perspective as  
10 the patient plays a passive role, having been anaesthetized. A clinician-centred  
11 approach has also been the focus of different observational studies of handovers at  
12 hospitals, often with the aim of mapping information dynamics and communication  
13 processes [16, 17]. As part of the patient-centred care movement, techniques such as  
14 patient and family shadowing have been developed within a more practice-based  
15 improvement or change perspective [18]. The aim of such efforts is to have an  
16 observer follow a patient and family throughout a selected care experience (often in-  
17 hospital surgery or trauma care) to view and capture the details of the entire care  
18 experience from the point of view of the patient and family.  
19  
20  
21  
22  
23  
24  
25  
26  
27  
28  
29  
30  
31  
32  
33  
34  
35  
36  
37  
38  
39  
40

41 In the “Quality and Safety in Transitional Care of the Elderly” study, real-time  
42 observations of transitional care practice constitute the main data material (supported  
43 by structured interviews and document analyses), combining the professional  
44 perspective and the patient perspective by including patients, next of kin and care  
45 providers in observational case studies.  
46  
47  
48  
49  
50

## 51 52 53 54 55 **METHODS AND ANALYSIS** 56 57 58 59 60

1  
2  
3 The “Quality and Safety in Transitional Care of the Elderly” study (Phase 1) employs  
4 a case study research design using multiple qualitative methods. Case studies are a  
5 preferred design within complex contexts where it is difficult to isolate variables or  
6 where strong interactions occur among variables [19], which is particularly relevant  
7 for this study of transitional care involving multiple contexts and variables. Two cases  
8 are chosen based on a most dissimilar strategy, where a case consists of one hospital  
9 along with its associated nursing homes and home-based nursing services:  
10  
11  
12  
13  
14  
15  
16  
17

- 18 • **Case A** consists of a small rural hospital (approximately 2000 employees) and  
19 three relatively small rural nursing homes with associated home care services  
20 in three municipalities.  
21  
22  
23  
24
- 25 • **Case B** consists of a relatively large city-based university hospital  
26 (approximately 7000 employees) and three relatively large city-based nursing  
27 homes with associated home care services in one municipality.  
28  
29  
30  
31

32 Both cases are situated in the same Regional Health Authority in Norway.  
33  
34  
35

36 The aim of the case study research design is four-fold: (a) to explore the phenomenon  
37 of transitional care; (b) to become familiar with each case as a stand-alone entity,  
38 allowing unique patterns of each case to emerge; (c) to conduct cross-case  
39 comparisons, searching for patterns across the cases (similarities and differences); and  
40 (d) to contribute to the development of context-specific theories of transitional care  
41 and the factors influencing quality and safety in transitional care.  
42  
43  
44  
45  
46  
47  
48  
49  
50

51 Two types of transitions will be studied in case A and case B, as illustrated in Figure  
52

53 1. The transitions included are the admission of elderly patients to hospital from  
54  
55  
56  
57  
58  
59  
60



1  
2  
3 nursing home or home with home-based care services and the discharge of elderly  
4  
5 patients from hospital to nursing home or home with home-based care services.  
6  
7  
8

9  
10 [Insert Figure 1 here]

11 The admission transitions included are acute admissions of elderly from nursing  
12 homes or home with home-based care services to the emergency department at the  
13 hospital via ambulance or the municipal emergency clinic. The discharge transitions  
14 included are the discharge of elderly patients from different hospital departments via  
15 ambulance or taxi transport to nursing homes or home with home-based care services.  
16  
17  
18  
19  
20  
21  
22  
23  
24

25 The overarching research questions guiding the study of transitional care in the two  
26 case studies are as follows:  
27  
28

- 29  
30 A. How are admission and discharge transitions of the elderly across primary  
31 (nursing homes, home-based services, general practitioners) and secondary  
32 (hospitals) care providers carried out?  
33  
34  
35  
36 B. How can different aspects of admission and discharge transitions of the elderly  
37 (e.g., coordination, multi-professional collaboration, patient participation)  
38 explain the quality of transitional care across primary and secondary care  
39 providers?  
40  
41  
42  
43  
44 C. What are the risks associated with admission and discharge transitions of the  
45 elderly across primary and secondary care providers?  
46  
47  
48  
49 D. How is the patient perspective (patients and next of kin) embedded in  
50 admission and discharge transitions of the elderly across primary and  
51 secondary care providers?  
52  
53  
54  
55  
56  
57  
58  
59  
60

1  
2  
3 E. What measures need to be initiated to ensure quality and safety in admission  
4 and discharge transitions of the elderly across primary and secondary care  
5 providers?  
6  
7  
8  
9

### 10 **Study sample**

11 The main aim of phase 1 of the “Quality and Safety in Transitional Care of the  
12 Elderly” project is to explore different aspects of transitional care of the elderly in  
13 different contexts. Including both admission and discharge and employing the most  
14 dissimilar case strategy (case A and case B) addresses the issue of different aspects  
15 and contexts. Concerning the elderly group, we focus on the frail elderly<sup>1</sup> (> 75 years  
16 old). Our literature review demonstrated that few studies exist concerning the quality  
17 and safety of frail elderly patients [7].  
18  
19  
20  
21  
22  
23  
24  
25  
26  
27  
28  
29

30 Within the frail elderly group, we want to include patients with different diagnoses  
31 covering both orthopaedic and medical conditions. We also want to cover patients  
32 with poly-pharmacy (> 5 medications) given the knowledge that adverse events in  
33 transitional care of the elderly are often associated with medication errors [7]. In  
34 Norway, approximately 50% of the elderly (> 70 years old) receive prescriptions for  
35 more than five medications, and 20% receive them for more than ten medications  
36 [20]. Within orthopaedic conditions, the frail elderly are at high risk of hip fracture  
37 (upper femur); in Norway, 9000 elderly are admitted to hospital with this diagnosis  
38 each year [21].  
39  
40  
41  
42  
43  
44  
45  
46  
47  
48  
49  
50  
51  
52  
53  
54

---

55 <sup>1</sup> One of several definitions of the frail elderly is “A person older than 75 years of age who has been  
56 hospitalized three or more times in the last 12 months and has three or more diagnoses in their medical  
57 records according to the International Classification of Diseases (ICD-10)” [22]. In this study, we seek  
58 to include patients according to such a definition of frail elderly in parts of the study sample.  
59  
60

1  
2  
3 Hip fracture represents a marker for vulnerability and is often associated with trauma  
4  
5 (bleeding, pain, loss of function, increased care need) for the elderly patient [23].  
6

7  
8 Among the medical conditions, chronic obstructive pulmonary disease (COPD) is a  
9  
10 diagnosis that increases amongst the elderly with a high mortality rate [24]. In  
11  
12 Norway, the elderly with COPD have a significantly higher risk (26%) of being  
13  
14 readmitted to hospital than with other diagnoses [25]. Other frequent medical  
15  
16 conditions for the elderly are stroke, diabetes, malnutrition and infections often  
17  
18 occurring in addition to other chronic diseases, resulting in a compound treatment and  
19  
20 care picture requiring integrated care.  
21

22  
23  
24  
25 Dementia is another common condition amongst the elderly. In Norway, 70 000  
26  
27 elderly individuals were diagnosed with dementia in 2009. The incidence is close to  
28  
29 20% in the 80- to 84-year-old age group, increasing to approximately 40% for the 90+  
30  
31 age group [21]. A countrywide supervision (Norwegian Board of Health Supervision)  
32  
33 of municipal health and social services for the elderly concluded that a lack of  
34  
35 continuity exists in the care of frail elderly with dementia [21].  
36  
37  
38  
39

40  
41 Based on the discussion thus far, the patient and next-of-kin inclusion criteria for the  
42  
43 study are as follows:  
44

- 45 • Elderly patients (>75 years old) receiving healthcare in the municipality  
46  
47 (nursing home or home-based care services) with
  - 48 ○ Hip fracture (upper femur) or
  - 49 ○ Chronic obstructive pulmonary disease (COPD)-related problems
  - 50 ○ (e.g., pneumonia, respiratory disorder)
  - 51
  - 52
  - 53
  - 54
  - 55
  - 56
  - 57
  - 58
  - 59
  - 60

- Demented patients admitted or discharged with one of the two diagnoses (upper femur hip fracture or COPD-related problems)
- Poly-pharmacy (>5 medications)
- Next of kin for the patients meeting the above inclusion criteria

Inclusion criteria might be adjusted if patient volume is limited. If that is the case, patients older than 70 years with other medical conditions (e.g., stroke, diabetes, malnutrition, infections) than upper femur fracture and COPD-related problems will also be included. Poly-pharmacy and variation across orthopaedic and medical patients will be sought.

The main criterion for inclusion of healthcare personnel in the study has been their relation to the transitional care of the included patient group, as previously described. Healthcare personnel involved in admission or discharge, in community-based care (nursing homes or home-based services) or hospital services to be included in the study sample include the following professional groups in case A and case B: (a) paramedics, (b) doctors at hospital, (c) doctors employed at nursing homes, (d) general practitioners, (e) nurses at hospital, (f) nurses in municipalities (nursing homes, home-based services), (g) physiotherapists at hospital, (h) physiotherapists in municipalities, and (i) community-based patient coordinators. Variation in gender and experience among healthcare personnel will be sought.

### **Data collection**

The study employs a triangulation of qualitative methods [26]; participant observation constitutes the main part, supported by document analysis and followed by structured interviews. Table 1 displays the different qualitative methods employed in the study together with expected data materials in case A and case B.

[Insert Table 1 here]

Data collection will be standardized across the two case study sites using an agreed observation guide and interview guide. One researcher (the third author) will conduct observations and interviews related to admission in case A and case B while another researcher (the second author) will conduct observations and interviews related to discharge in case A and case B. The two researchers will conduct data collection simultaneously at the two case study sites and will meet regularly to discuss first impressions, review data collection tools and methods, and conduct possible follow-ups of data. The three data collection methods are described in more detail in the following sections.

#### *Participant observation*

Participant observation [27] will be carried out related to admission and discharge transitions according to an agreed-upon observation guide based on several literature reviews [7, 28, 29]. Themes in the observation guide include: (a) structures/plans, (b) coordination with other care providers, (c) conversation/coordination with patient and next of kin, (d) interdisciplinary collaboration, (e) documentation/information, (f) time factors, stress, other elements, and (g) results. In addition, demographic data related to patients (age/gender, diagnosis, medications) and personnel (age/gender, position, work experience) will be noted. No tape-recording will be used during the observations due to the complexity of personnel, patient and next of kin involved. Observation summaries will be written consecutively. Observations include short

1  
2  
3 conversations with all personnel involved in the transition and with the patients and  
4  
5 next of kin.  
6  
7

8  
9  
10 Observation of admissions will start with the handover from ambulance personnel to  
11  
12 nurses in the emergency room and end with a structured conversation with the patient  
13  
14 at the ward one or two days after hospital admittance. The researcher will observe the  
15  
16 interaction, coordination and dialogue (written in the forms of information and  
17  
18 documentation developed and transferred and oral in the forms of communication)  
19  
20 among healthcare personnel (e.g., paramedics, nurses, doctors), patient and next of  
21  
22 kin. Copies of admission summaries and medication lists will be made during the  
23  
24 participant observations. The observations on the day of admittance will conclude  
25  
26 with short conversations with healthcare personnel asking them to clarify aspects of  
27  
28 the current admission and evaluate the quality of the admission process.  
29  
30  
31

32  
33  
34 Observations of discharges will start in the morning of the day of discharge (with  
35  
36 doctor's round) and end with structured conversations with the patient and involved  
37  
38 personnel at the nursing home or in home-based care services from one or two days  
39  
40 after discharge and up to 30 days after discharge. The researcher will observe the  
41  
42 interaction, coordination and dialogue (written and oral) among healthcare personnel  
43  
44 (e.g., nurses, doctors, physiotherapists), patient and next of kin on the day of  
45  
46 discharge. Copies of discharge summaries and medication lists will be made during  
47  
48 the participant observation. The researcher will, if possible, observe the patient at  
49  
50 arrival at the nursing home or home with home-based care services and conduct a  
51  
52 follow-up observation one or two days after discharge. During the follow-up  
53  
54 observation, copies of written documentation related to follow-up care (care plans,  
55  
56  
57  
58  
59  
60

1  
2  
3 medical cards, doctors' and nurses' notes) will be made, if available. During  
4  
5 discharge observations, short conversations with nurses and physicians at hospital and  
6  
7 in primary care will be conducted to clarify aspects of the current discharge and  
8  
9 evaluate the quality of the discharge process. If possible, some of the patients will be  
10  
11 observed up to 30 days after discharge to map follow-up care, readmissions and  
12  
13 transitions between short- and long-term rehabilitation institutions. The follow-up  
14  
15 observations will include mapping of where the patients stay during the 30-day  
16  
17 period, the care providers involved, and short conversations with patients, next of kin  
18  
19 and personnel (face-to-face or via the phone).  
20  
21  
22  
23

#### 24 25 *Individual interviews*

26  
27 As part of the participant observations, short and open-ended individual interviews  
28  
29 will be conducted with the observed patients and next of kin one or two days after  
30  
31 admission to and discharge from hospital. The interviews will be in the form of  
32  
33 unstructured and interactive conversations with the aim of capturing interviewees'  
34  
35 experiences of transitional care, perspectives and stories related to the observed  
36  
37 admission or discharge process. Themes to be covered in the patient and next-of-kin  
38  
39 conversations include (a) transition process, (b) preparation/preparedness, (c)  
40  
41 involvement/participation, (d) information, (e) interdisciplinary collaboration, (f)  
42  
43 satisfaction, (g) incidents, and (h) improvements. During observations of discharge  
44  
45 transitions, several conversations might take place during the up to 30 days of follow-  
46  
47 up care.  
48  
49  
50  
51  
52

53  
54 After finishing the participant observation data collection, structured interviews will  
55  
56 be conducted with personnel in primary and secondary healthcare services involved in  
57  
58  
59  
60

1  
2  
3 admissions and discharge processes following an agreed-upon interview guide.  
4  
5 Themes to be covered in the personnel interviews include (a) coordination/interaction  
6  
7 among care providers (experiences, success, insufficiency, improvements), (b) multi-  
8  
9 disciplinary collaboration, (c) information exchange, (d) knowledge sharing, (e)  
10  
11 quality and safety, (f) patient and family involvement/education, (g) structure/  
12  
13 planning, and (h) challenges/barriers. The structured interviews will build on the  
14  
15 participant observations as the same researcher will conduct the observations and  
16  
17 interviews. Although no detailed analysis of observational data will exist at the time  
18  
19 of the structured interviews, the researcher will have conducted a rough “first  
20  
21 impression” analysis based on observational notes and summaries, giving her the  
22  
23 possibility to pick up on important issues after being in the field of transitional care.  
24  
25 This approach will provide her with an important contextual understanding that will  
26  
27 enable her to give the structured interviews more depth and examples on which to  
28  
29 build the conversation. The structured interviews of personnel in case A and case B  
30  
31 will build on a saturation principle [27], meaning that the number of interviews will  
32  
33 be adjusted according to the amount of accumulative information they bring.  
34  
35  
36  
37  
38  
39

#### 40 *Document analysis*

41  
42 Admission and discharge summaries, medication lists and written documentation  
43  
44 related to admission and follow-up care will be copied during the participant  
45  
46 observations at hospitals, nursing homes and home-based nursing care settings. The  
47  
48 documentation will act as important data material to be used in follow-up  
49  
50 conversations and interviews related to each of the observed patients and in general to  
51  
52 evaluate the quality of written documentation.  
53  
54  
55  
56  
57  
58  
59  
60



1  
2  
3 Registered adverse events related to coordination issues (mandatory field in the  
4 registration system) will be analysed for the 2008–2012 period according to  
5 frequency. A selection of events will be analysed in detail according to types, causes  
6 and topics. The documented events will be used to inform research question C and a  
7 detailed analysis of the risks involved in transitional care in case A and case B.  
8  
9  
10  
11  
12

### 13 14 15 **Data analysis**

16  
17 To ensure trustworthiness in the analysis, we will apply analyst triangulation and  
18 member checks [30, 31]. Our research team will discuss and refine the analysis  
19 according to our research questions and themes emerging in the data. All transcribed  
20 observations and interviews will be uploaded and systematized using Nvivo.  
21  
22  
23  
24  
25

26  
27 A “big picture” or total impression of the data material will first be created using  
28 Malterud’s step one in a systematic text condensation approach [32, 33]. This will  
29 involve the entire research team and an external researcher not involved in the design  
30 of the study. Researchers in the research team will individually read the data material  
31 and discuss overall emerging themes. After agreeing on a set of themes, the research  
32 team will meet with the external researcher who has individually created his/her  
33 overall themes to discuss and agree on a common set of themes to be included in the  
34 “big picture”. It is this total impression that will form the basis for the development of  
35 phase 2 of the “Quality and Safety in Transitional Care of the Elderly”, the evidence-  
36 based intervention program, and that will inform research questions A, B and E.  
37  
38  
39  
40  
41  
42  
43  
44  
45  
46  
47  
48  
49

50 Step two of the qualitative data analysis will involve in-depth analyses of two specific  
51 themes. This will involve the risk perspective in transitional care (research question  
52 C), carried out by the second author as the principal analyst, and the patient  
53 perspective in transitional care (research question D), carried out by the third author  
54  
55  
56  
57  
58  
59  
60

1  
2  
3 as the principal analyst. These analyses will involve creating sub-themes, categories,  
4  
5 and meaning units [32] as well as applying different theoretical perspectives (patient  
6  
7 participation, risk/resilience) to the data material and including researcher  
8  
9 triangulation with the rest of the research team.  
10

11  
12  
13  
14 After analysing the data from observations, interviews, and documents, member  
15  
16 checks [30, 31] will be conducted in two focus groups (one hospital based and one  
17  
18 community based) and in one workshop (common for hospital- and community-based  
19  
20 services) to validate the research findings and involve the participants in possible  
21  
22 intervention measures (Phase 2) in each of the two cases (a total of four focus groups  
23  
24 and two workshops). All participants in Phase 1 of the “Quality and Safety in  
25  
26 Transitional Care of the Elderly” study will be invited to attend the workshops. The  
27  
28 focus groups will consist of five to seven participants included in the study covering  
29  
30 both admission and discharge at the hospital and nursing homes and home-based care  
31  
32 services in the municipalities.  
33  
34  
35  
36  
37  
38  
39

### 40 **Ethical concerns and dissemination**

41  
42 The study has been approved by the Norwegian Regional Committees for Medical  
43  
44 and Health Research Ethics (REC, no. 2011/1978).  
45  
46  
47  
48

49 The study is based on informed written consent, and informants can withdraw from  
50  
51 the study at any point in time. Interview and observation data material will be  
52  
53 managed confidentially (indirect person identifiable). Tape recordings will be deleted  
54  
55 immediately after transcription. Each transcribed interview and observation will be  
56  
57  
58  
59  
60

1  
2  
3 marked with a code, and the list matching the person identification and code will be  
4  
5 securely stored (locked cabinet or password-protected PC at the university) by the  
6  
7 research group (principal researcher). Transcribed data material will be stored at the  
8  
9 research institution for three years after the project ends. Paper copies of admission  
10  
11 and discharge summaries, medication lists and written documentation related to  
12  
13 follow-up care (if available) will be made, deleting direct person-identifiable  
14  
15 information and any information not relevant for this study. Thus, superfluous  
16  
17 information (e.g. previous medical conditions) will not be included. Copies will be  
18  
19 made and signed by the responsible nurse, checking that all direct person-identifiable  
20  
21 information and access information is deleted. The copies of patient-related  
22  
23 summaries will be stored in a locked cabinet at the research institution.  
24  
25  
26  
27  
28

29  
30 Results are to be disseminated at several congresses and research conferences and in  
31  
32 articles published in peer-reviewed journals. In addition we are going to present study  
33  
34 results to people outside the academic community through public presentations.  
35  
36  
37  
38

## 39 **DISCUSSION**

40  
41  
42  
43 Real-time observation of transitions involving patients crossing care provider and  
44  
45 care-level boundaries is a complex endeavour. It involves data collection in multiple  
46  
47 locations, with multiple professions, patients and next of kin. Transitional care is  
48  
49 furthermore a complex phenomenon involving a substantial set of dimensions or  
50  
51 factors (e.g., patient involvement, coordination, multi-professional collaboration,  
52  
53 documentation, information, or communication) to be explored and mapped. As a  
54  
55 whole, this complexity forces fierce prioritisations on the design of a study of  
56  
57  
58  
59  
60

1  
2  
3 transitional care of the elderly. In this study, prioritisations have been taken along the  
4  
5 axes of patient groups included (hip fracture and COPD, with or without dementia),  
6  
7 the cases included (one rural and one city based), and the researchers included (single  
8  
9 researchers on admission and discharge respectively, but with analyst triangulation).  
10

11  
12  
13  
14 The main contribution of the study will be contextual knowledge created by real-time  
15  
16 observations of transitional care practices of the elderly crossing care provider  
17  
18 boundaries. This adds to the existing literature primarily concerned with individual  
19  
20 and focus group interviews with professionals and/or patients.  
21  
22

23  
24  
25 Undoubtedly, several limitations exist in terms of the design of the “Quality and  
26  
27 safety in Transitional Care of the Elderly” project due to the complexity of the scope  
28  
29 and aims of the study. Most of the limitations are caused by practical and resource-  
30  
31 based constraints and obstacles. One of the limitations concerns data collection at  
32  
33 admission, where observation start is set in the emergency room at the handover from  
34  
35 ambulance personnel to the ER nurse. Ideally, data collection on admission transitions  
36  
37 from primary care to secondary care would benefit from starting at the nursing home  
38  
39 or home with home-based care services and following the patient on the day of  
40  
41 admission. This has not been possible to incorporate into the current project due to the  
42  
43 size of the study and practical problems with recruiting these patients and their care  
44  
45 providers.  
46  
47  
48

49  
50  
51 In addition, it would have been valuable for the study to acquire data on the entire  
52  
53 elderly patient pathway, from day of admission through hospital stay (with belonging  
54  
55 transitions) through discharge and 30-day follow-up care. As the “Quality and Safety  
56  
57  
58  
59  
60

1  
2  
3 in Transitional Care of the Elderly” study is designed, data from hospital stay is  
4  
5 restricted to number of days hospitalised. Another limitation relates to the challenges  
6  
7 of data collection in case A (rural). Due to its rural location, practical and resource-  
8  
9 based issues (e.g., travel costs for researchers) will create obstacles for the depth and  
10  
11 length of data-collection activities. In particular, this will influence the possibility to  
12  
13 do follow-up observations up to 30 days after discharge.  
14  
15

16  
17  
18 Finally, a note on possible observer bias is worth mentioning as we have chosen to  
19  
20 conduct the observations with single researchers (both having a nursing background),  
21  
22 doing both the observations and interviews in admission and discharge transitions.  
23  
24 Ideally, an observation team with a minimum of two researchers with different  
25  
26 backgrounds could better cover the complexity of the observation setting involving  
27  
28 both the professional and the patient perspectives. We tried to control the observer  
29  
30 bias by setting up the observations of admission and discharge at the same point in  
31  
32 time so that the regular exchange of fieldwork impressions between the two  
33  
34 researchers can take place. In one or two observations, we will include an additional  
35  
36 researcher from the research team to validate the observation summaries. In addition,  
37  
38 we have set up weekly meetings or updates in the observational periods with the  
39  
40 entire research team (backgrounds within nursing, management, and quality and  
41  
42 safety) to debrief and discuss preliminary impressions. Regular discussions amongst  
43  
44 the research group and a wider international advisory board will also provide  
45  
46 opportunities for reflexivity and the development of insights into fieldwork and data  
47  
48 analysis.  
49  
50  
51  
52  
53  
54  
55  
56  
57  
58  
59  
60

1  
2  
3 Despite the limitations of the study design, we argue that the uniqueness of our study  
4 design applied to explore different aspects of transitional care is considerable. Thus  
5 far, a limited number of studies have applied participant observation in order to grasp  
6 the context and complexity surrounding transitional care. The use of the triangulation  
7 of methods to increase the credibility of the research findings [26] and the focus on  
8 the frail elderly identified as a particularly vulnerable group in transitional care [34]  
9 represent other novel aspects of this study. The application of professional- and  
10 patient-centred perspectives will generate new and increased understanding within the  
11 field of transitional care of the elderly. The study results will furthermore be used to  
12 guide the design of an intervention program with specific measures to be implemented  
13 to ensure quality and safety in the transitional care of the elderly across primary and  
14 secondary care (Phase 2).  
15  
16  
17  
18  
19  
20  
21  
22  
23  
24  
25  
26  
27  
28  
29

### 30 **Competing interests**

31 The authors declare that they have no competing interests.  
32  
33  
34

### 35 **Authors' contribution**

36 KAA developed the original proposal for grant application, planned the study design  
37 and the study protocol, contributed to the development of data-collection tools and  
38 drafted and revised this manuscript. KAL contributed to the study design, was  
39 responsible for the development of data-collection tools and ethical approval, and  
40 contributed to drafting and revising the manuscript. DND contributed to the  
41 development of data collection tools and commented on study protocol and  
42 manuscript draft and revision. MS commented on study protocol and data-collection  
43 tools, and contributed to manuscript draft and revision. All authors read and approved  
44 the final manuscript.  
45  
46  
47  
48  
49  
50  
51  
52  
53  
54  
55  
56  
57  
58  
59  
60

## Acknowledgements and funding

The study "Quality and Safety in Transitional Care of the Elderly" has received funding from Norwegian Research Council (under the title "Quality and Safety in Elderly Health and Care Services – The role of interactions and transitions") under grant agreement no. 204637 and from the Western Norway Regional Health Authority under project no. 911642.

We would like to thank the two funding organisations for the possibility they have given us for carrying out research on what we value as an important topic. We also want to express our gratitude to Berit Tjørhom for her contribution in the grant application phase and to Oliver Groene for his comments on an earlier draft of this study protocol manuscript.

## REFERENCES

- 1 Coleman, E.A. & Boult, C. Improving the Quality of Transitional Care for Persons with Complex Care Needs. *Journal of the American Geriatric Society* 2003;**51**(4): 556-557.
- 2 Coleman, E.A. Falling through the Cracks: Challenges and opportunities for Improving Transitional Care for Persons with Complex Care Needs. *Journal of the American Geriatric Society* 2003;**51**(4): 549-555.
- 3 Tsilimingras, D., Rosen, A.K., & Berlowitz, D.R. Patient Safety in Geriatrics: A Call for Action. *Journal of Gerontology* 2003;**58**(9): 813-819.
- 4 Naylor, M. & Keating, S.A. Transitional Care. *American Journal of Nursing* 2008;**108**(9):58-63.

- 1  
2  
3 5 Garaasen, H. & Johnsen, R. The quality of communication about older patients  
4  
5 between hospital physicians and general practitioners: A panel study  
6  
7 assessment. *BMC Health Services Research* 2007;7:133.  
8  
9  
10 6 LaMantia, M.A. Scheunemann, L.P., Viera, A., et al. Interventions to improve  
11  
12 transitional care between nursing homes and hospitals: A Systematic Review.  
13  
14 *JAGS* 2010;58: 777-782.  
15  
16 7 Laugaland, K.A., Aase, K. & Barach, P. Addressing risk factors for transitional care  
17  
18 of the elderly - literature review. In Albolini et al. (Eds.): *Healthcare Systems*  
19  
20 *Ergonomics and Patient Safety*. Taylor & Francis Group, London 2011.  
21  
22  
23 8 Tsilimingras, D. & Bates, D.W. Addressing Post-discharge Adverse Events: A  
24  
25 neglected Area. *The Joint Commission Journal on Quality and Patient Safety*  
26  
27 2008;34(2): 85-97.  
28  
29  
30 9 Johnson, J., Barach, P., & Vernooij- Dassen, M. Conducting a multicentre and  
31  
32 multinational qualitative study on patient transitions. *BMJ Quality & Safety*  
33  
34 2012;21(Suppl 1): i22-i28.  
35  
36  
37 10 Hesselink, G., Flink, M., Olsson, M., et al. Are patients discharged with care? A  
38  
39 qualitative study of perceptions and experiences of patients, family members  
40  
41 and care providers. *BMJ Quality & Safety* 2012;21(Suppl 1): i39-i49.  
42  
43  
44 11 Flink, M., Ohlen, G., Hansagi, H., et al. Beliefs and experiences can influence  
45  
46 patient participation in handover between primary and secondary care - a  
47  
48 qualitative study of patient perspectives. *BMJ Quality & Safety*  
49  
50 2012;21(Suppl 1): i76-i83.  
51  
52  
53 12 Flink, M., Hesselink, G., Pijnenborg, L., et al. The key actor: a qualitative study of  
54  
55 patient participation in the handover process in Europe. *BMJ Quality &*  
56  
57 *Safety*, 2012;21(Suppl 1): i89-i96.  
58  
59  
60



- 1  
2  
3 13 Groene, R.O., Orrego, C., Sunol, R., et al. "It's like two worlds apart": an analysis  
4 of vulnerable patient handover practices at discharge from hospital. BMJ  
5 Quality & Safety, 2012;**21**:(Suppl 1): i67-i75.  
6  
7  
8  
9  
10 14 Siemsen, I.M.D., Madsen, M.D., Pedersen, L.F., et al. Factors that impact on the  
11 safety of patient handovers: An interview study. Scandinavian Journal of  
12 Public Health 2012;**40**(5): 439-448.  
13  
14  
15  
16 15 Flin, R. & Mitchell, L. (Eds.). Safer Surgery. Analysing behaviour in the operating  
17 theatre. Ashgate, Surrey 2009.  
18  
19  
20  
21 16 Abraham, J., Kannampallil, T.G., & Patle, V.L. Bridging gaps in handoffs: A  
22 continuity of care based approach. Journal of Biomedical Informatics 2012;**45**:  
23 240-254.  
24  
25  
26  
27 17 Lyhne, S., Georjoui, A., Marks, A., et al. Towards an understanding of the  
28 information dynamics of the handover process in aged in care settings -A  
29 prerequisite for the safe and effective use of ICT. International Journal of  
30 Medical Informatics 2012;**8**: 452-460.  
31  
32  
33  
34 18 DiGioia, A. & Greenhouse, K.P. Patient and family shadowing. JONA 2011;**41**(1):  
35 23-28.  
36  
37  
38  
39 19 Yin, R.K. Case Study Research: Design and methods. Third edition. Applied  
40 Social Research methods series. SAGE Publication, Thousand Oaks 2003.  
41  
42  
43  
44 20 The Norwegian Prescription Database 2004-2008 Medication Statistics 2009:2.  
45 Norwegian Institute of Public Health, Oslo 2009. Available at:  
46 <http://www.fhi.no/dokumenter/197a20d501.pdf> (22.12.2012)  
47  
48  
49  
50 21 Norwegian Board of health Supervision. Complex tasks and services require  
51 stronger governance. Summary report of countrywide supervision in 2010 of  
52 municipal health and social services for elderly people. Report no. 5/2011.  
53  
54  
55  
56  
57  
58  
59  
60

- 1  
2  
3 22 Gurner, U. & Thorslund, M. Holistic perspective is needed in care of  
4  
5 multiimpaired elderly. A proposal for structural change of the organization of  
6  
7 care in the county of Stockholm. *Läkartidningen* 2001;**98**: 2596-2602.  
8  
9  
10 23 Nickelsen, T. Venter for lenge på operasjon: Eldre med hoftebrudd får delirium.  
11  
12 Research Magazine Apollon, University of Oslo, Norway 2010. Available at:  
13  
14 <http://www.apollon.uio.no/artikler/2010/delirium.html> (22.12.2012)  
15  
16  
17 24 World Health Statistics (2008).  
18  
19 25 Lindman, A.S., Damgaard, K., Tjomsland, O., et al. Re-admissions of elderly in  
20  
21 Norway. The Norwegian Knowledge Centre for the Health Services (NOKC),  
22  
23 Oslo 2012.  
24  
25 26 Lincoln, Y.S. & Guba, E.G. Naturalistic inquiry. Sage Publication, London 1985.  
26  
27 27 Polit, D.F. & Beck, C.T. Nursing research: Generating and Assessing Evidence for  
28  
29 Nursing Practice (8th ed.). Wolters Kluwer/Lippincott/Williams & Wilkins,  
30  
31 Philadelphia, PA. 2008.  
32  
33  
34 28 Laugaland, K.A., Aase, K., & Barach, P. Interventions to improve patient safety in  
35  
36 transitional care - a review of the evidence. *Work*, 2012;**41**: 2915-2924.  
37  
38 doi:10.3233/WOR-2012-0544-2915  
39  
40 29 Dyrstad, D.N., Testad, I., Aase, K., et al. A systematic review of the literature on  
41  
42 patient participation in transitions of the elderly. *Cognition, Technology &*  
43  
44 *Work*, Special Issue 2013 (forthcoming).  
45  
46  
47 30 Lincoln, Y.S. & Guba, E.G. Naturalistic Inquiry. Sage, Beverly Hills, CA 1985.  
48  
49 31 Seale, C. The quality of qualitative research. Sage, London 1999.  
50  
51 32 Malterud, K. Kvalitative metoder i medisinsk forskning. Universitetsforlaget 2003.  
52  
53 33 Malterud, K. Systematic text condensation: A strategy for qualitative analysis.  
54  
55  
56 *Scandinavian Journal of Public Health* 2012;**40**(8): 795-805.  
57  
58  
59  
60

1  
2  
3 34 Coleman, E.A., Min, S.J., Chomiak, A., et al. Posthospital Transitions: Patterns,  
4  
5 Complications, and Risk Identification. Health Services Research 2003;**39**(5).  
6  
7  
8  
9  
10  
11  
12  
13  
14  
15  
16  
17  
18  
19  
20  
21  
22  
23  
24  
25  
26  
27  
28  
29  
30  
31  
32  
33  
34  
35  
36  
37  
38  
39  
40  
41  
42  
43  
44  
45  
46  
47  
48  
49  
50  
51  
52  
53  
54  
55  
56  
57  
58  
59  
60

For peer review only

Table 1 Data-collection methods and material.

| Methods                                                                                                               | Case A (rural)                                                                                                                                                                                                                                                                                                     | Case B (city)                                                                                                                                                                                                                                                                                                      |
|-----------------------------------------------------------------------------------------------------------------------|--------------------------------------------------------------------------------------------------------------------------------------------------------------------------------------------------------------------------------------------------------------------------------------------------------------------|--------------------------------------------------------------------------------------------------------------------------------------------------------------------------------------------------------------------------------------------------------------------------------------------------------------------|
| <u>Participant observation</u><br>(including open-ended, interactive conversations with patients, next of kin, staff) | <u>Admission:</u> 8-10 patient cases<br>(mix of orthopaedic and medical, 2-5 hours of observation per case)<br><u>Discharge:</u> 8-10 patient cases<br>(mix of orthopaedic and medical, 5-10 hours <sup>2</sup> of observation per case)                                                                           | <u>Admission:</u> 12-15 patient cases<br>(mix of orthopaedic and medical, 2-5 hours of observation per case)<br><u>Discharge:</u> 12-15 patient cases<br>(mix of orthopaedic and medical, 5-10 hours <sup>2</sup> of observation per case)                                                                         |
| <u>Individual interviews with staff</u>                                                                               | <u>Admission:</u> 12-15 (ambulance workers, ER nurses, ER doctors)<br><u>Discharge:</u> 20-30 (hospital doctors, general practitioners, nursing home doctors, hospital nurses, nursing home nurses, home-based care nurses, hospital physicians, community-based physicians, community-based patient coordinators) | <u>Admission:</u> 12-15 (ambulance workers, ER nurses, ER doctors)<br><u>Discharge:</u> 20-30 (hospital doctors, general practitioners, nursing home doctors, hospital nurses, nursing home nurses, home-based care nurses, hospital physicians, community-based physicians, community-based patient coordinators) |
| <u>Document analysis</u>                                                                                              | <u>Admission:</u> Admission summaries, medication lists<br><u>Discharge:</u> Discharge summaries, medication lists, follow-up care notes                                                                                                                                                                           | <u>Admission:</u> Admission summaries, medication lists<br><u>Discharge:</u> Discharge summaries, medication lists, follow-up care notes                                                                                                                                                                           |

<sup>2</sup> If practically possible, some of the observations will include data collection (patient and personnel conversations, number of transitions) related to follow-up care (30 days).

Figure 1. Transitions included in the study

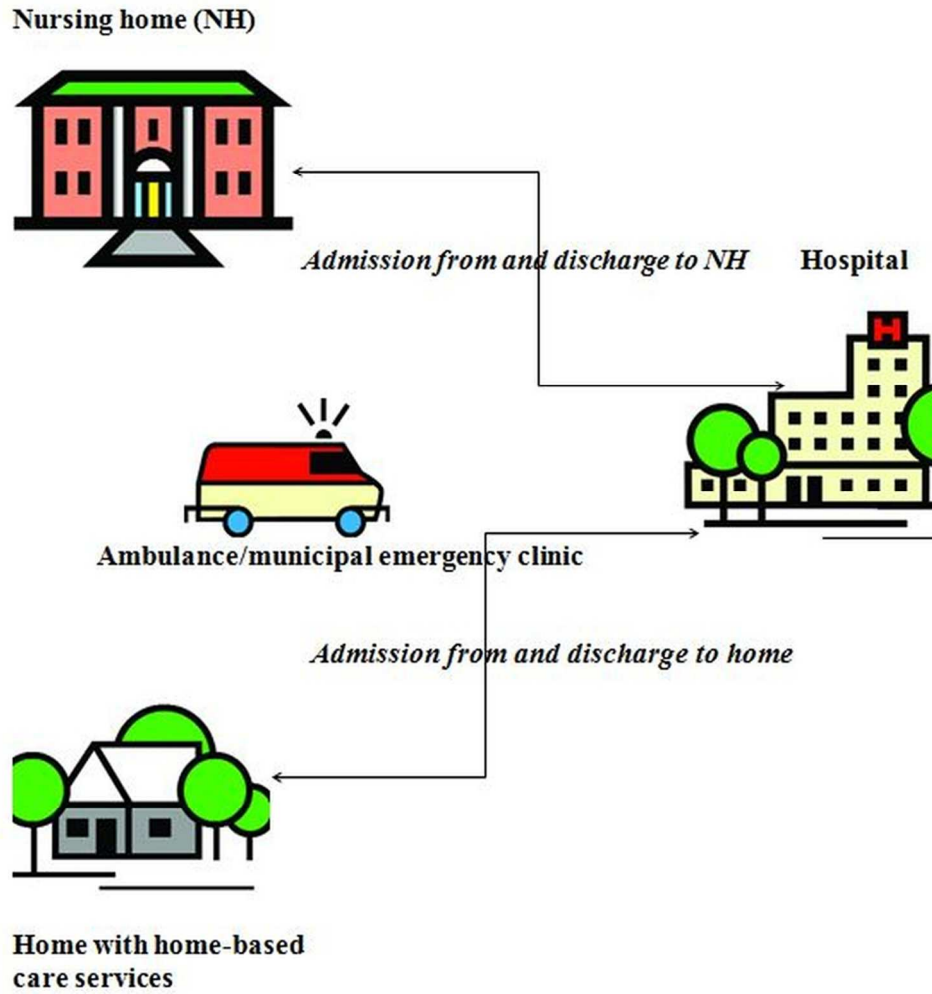

90x104mm (300 x 300 DPI)
